# Supplementary material
Source: PubMed Central journal article supplement (PMC8715216)
Supplement: mmc1.pdf [file mmc1.pdf]

**Biophysical Journal, Volume 120**

**Supplemental information**

**Modeling the native ensemble of PhuS using enhanced sampling MD  
and HDX-ensemble reweighting**

**Kyle C. Kihn, Tyree Wilson, Ally K. Smith, Richard T. Bradshaw, Patrick L.  
Wintrode, Lucy R. Forrest, Angela Wilks, and Daniel J. Deredge**

**Supporting Material:**

**Modeling the native ensemble of PhuS using enhanced-sampling MD  
and HDX-ensemble reweighting**

K. Kihn<sup>1</sup>, T. Wilson<sup>1</sup>, A. Smith<sup>1</sup>, R. T. Bradshaw<sup>2</sup>, P. L. Wintrode<sup>1</sup>, L. R. Forrest<sup>3</sup>, A. Wilks<sup>1</sup>, D.

J. Deredge<sup>1\*</sup>

<sup>1</sup>Department of Pharmaceutical Sciences, School of Pharmacy, University of Maryland,  
Baltimore, MD, USA, <sup>2</sup>Department of Chemistry, King's College London, London, UK, and  
<sup>3</sup>Computational Structural Biology Section, National Institute of Neurological Disorders and  
Stroke, National Institute of Health, Bethesda, MD, USA

\*For correspondence: [dderedge@rx.umaryland.edu](mailto:dderedge@rx.umaryland.edu) (DJD)

**Running title:**

Enhanced sampling MD and HDXer of PhuS

## Supplemental Methods

Ensemble reweighting adjusts the relative populations ('weights') of frames within an initial probability distribution such that the final ensemble average of a given property conforms to a target value. A maximum entropy criterion enforces that the minimal possible bias is applied to the initial distribution during the reweighting process. In the case of HDXer, conformity with the target value (the experimental HDX-MS data) can be modified by means of an uncertainty distribution of adjustable width, controlled by the parameter  $\gamma$ . Overall, frames from the initial structural ensemble (in our case from simulations) which most conform with the experimental data will be upweighted, and vice versa.

Briefly and methodologically, HDXer adjusts the original potential energy function of the simulation  $U(X)$  to create a new potential  $U_{corr}(X)$ , with populations that better reflect the experimental data. The correction itself takes the form of the predicted experimental data (here at the protection factor level, using the phenomenological equation of Best & Vendruscolo), and a per-residue variable  $\lambda_i$  as in Eq. 3.

$$U_{corr}(X) = U(X) - k_B T \sum_i \lambda_i [\beta_C N_{C,i}(X) + \beta_H N_{H,i}(X)] \quad (3)$$

The values  $\lambda_i$  must be solved iteratively during the reweighting process. Optimal values of  $\lambda_i$  minimize a cost function that balances the error to the target data (including the uncertainty controlled by  $g$ ), with the magnitude of the bias applied to the initial distribution. After optimization, the final  $\lambda_i$  factors are then normalized over the entire simulation resulting in an adjusted weight value for each frame as follows in Eq. 4.

$$\Omega(X_k) = \frac{\exp\{\sum_i \lambda_i [\beta_C N_{C,i}(X_k) + \beta_H N_{H,i}(X_k)]\}}{\sum_{k'} \exp\{\sum_i \lambda_i [\beta_C N_{C,i}(X_{k'}) + \beta_H N_{H,i}(X_{k'})]\}} \quad (4)$$

The denominator is a normalization term calculated by summing over all simulation configurations.

The details of the statistical methodology to determine the optimal  $\lambda_i$  factors such that the adjusted deuteration fraction from the reweighted ensemble fits the experimental deuteration fraction within defined statistical error has been described (1).

## Supplemental Results:

**TICA and maximum entropy reweighting using locally-unfolded models.** For a thorough validation of the use of TICA in conjunction of HDXer, we employed the same strategy as in UF- $\alpha 6,7B$  (Fig. 2D,E and F) with all UF models. The ensemble from a given UF model was combined with the ensemble from the apo-PhuS crystal structure configuration to generate 5 mixed ensembles. These mixed ensembles were then subjected to TICA which consistently separated the frames based on the simulation of origin (Fig. S9A) in the first dimension of separation (TICA1). The separation is also seen following randomization of the frames in the mixed ensemble. In the second TICA dimension, distinct secondary clustering was consistently observed

for the frames originating from UF model simulation (Fig. S9A), possibly reflecting the more dynamic behavior of the UF ensembles.

Separately, HDXer was performed on the mixed ensembles using experimental HDX-MS data from apo and holo-PhuS. A range of  $\gamma$  values from 0.1 to 9 were used for the reweighting and a decision plot, an apparent work  $W_{app}$  vs Mean Squared Deviation plot, was constructed to determine a suitable value. An examination of the decision plots for the reweighting of mixed ensembles vs apo-PhuS HDX-MS as a target data (Fig. S9C) shows that less  $W_{app}$  is required to achieve closer agreement with the experimental data (smaller MSD values), in ensembles containing frames from models UF- $\alpha$ 6,7A, UF- $\alpha$ 6,7B and UF- $\alpha$ 6,7,8 than those containing frames from UF- $\alpha$ 6 and UF- $\alpha$ 7. However, when reweighting to holo-PhuS HDX-MS data, lower MSD values were achieved with less  $W_{app}$  than when reweighted to apo-PhuS HDX-MS. Moreover, the decision plots were observed to be independent from the make-up of the mixed ensemble when reweighted to holo-PhuS. This is likely because, in the case of reweighting to holo-PhuS HDX-MS data, most of the effective  $W_{app}$  is being applied to the upweighting of frames originating from the simulation with the crystallographic configuration (4IMH), a constant component of the mixed ensembles.

The ideal  $\gamma$  value selected from these plots represented a  $W_{app}$  of  $\sim 2$  kJ/mol and was below the inflection point of the curve, i.e., where the best fit is achieved without overfitting the data (Fig. S9C). This value is then used to determine the final weights ( $\Omega_f$ ) for each frame of the ensemble in the reweighting process. Using this value, the resulting fold change in weight ( $\log(\Omega_f/\Omega_i)$  where  $\Omega_i$  is the initial weight of the frame prior to reweighting) of each individual frame was mapped to the respective clusters resulting from TICA dimensional reduction (Fig. S9B) to determine weight redistribution within and across clusters. When HDXer was performed against apo-PhuS HDX-MS data, the average  $\log(\Omega_f/\Omega_i)$  of the cluster originating from the apo crystal structure was consistently downweighted (Fig. S9B top). On the other hand, clusters originating from the UF models displayed mixed behavior. One subcluster is typically seen to be heavily downweighted, while the other consistently displays the highest average  $\log(\Omega_f/\Omega_i)$  (Fig. S9B top). Here again, the mixed ensemble containing model UF- $\alpha$ 6,7B with  $\alpha$ 6 and  $\alpha$ 7 partially unfolded is observed to have the most upweighted subcluster (subcluster 2) (Fig. S9B top). In contrast, when reweighting was performed against holo-PhuS HDX-MS (Fig. 2C bottom left, Fig. S9B bottom), the clusters containing frames generated from the apo crystal structure simulations consistently displayed the greatest average  $\log(\Omega_f/\Omega_i)$ , except for model UF- $\alpha$ 7.

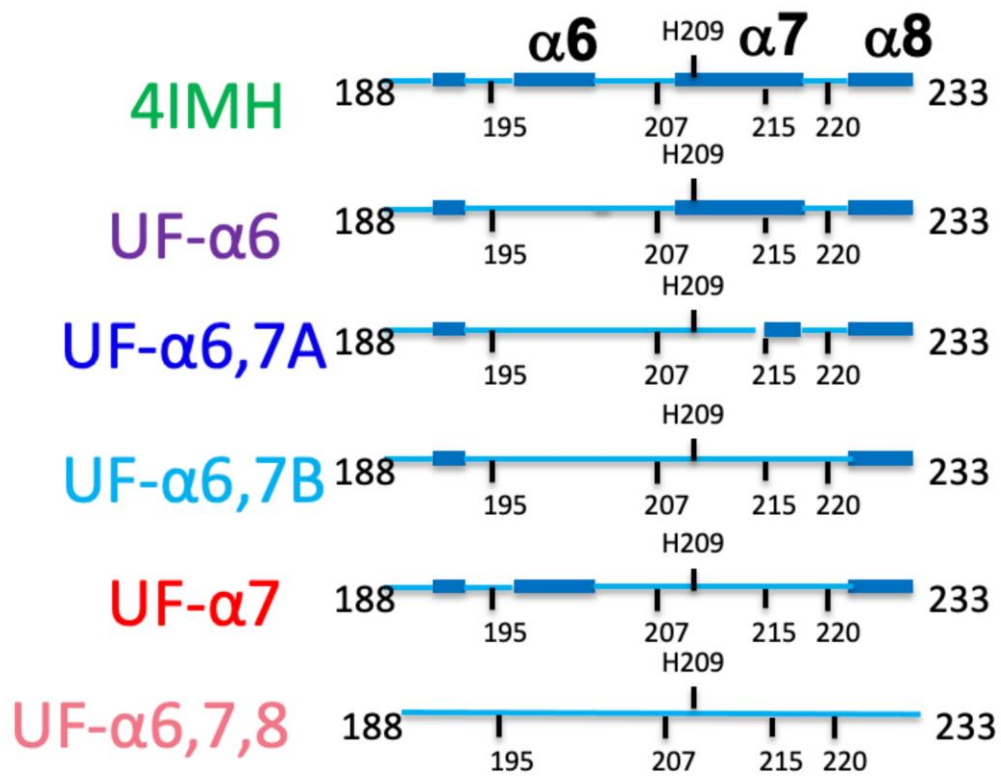

**Supplemental Figure 1:** Schematic diagram illustrating the secondary structure elements that were modeled as unstructured loops in the  $\alpha$ -6,7,8 region for the various locally-unfolded models.

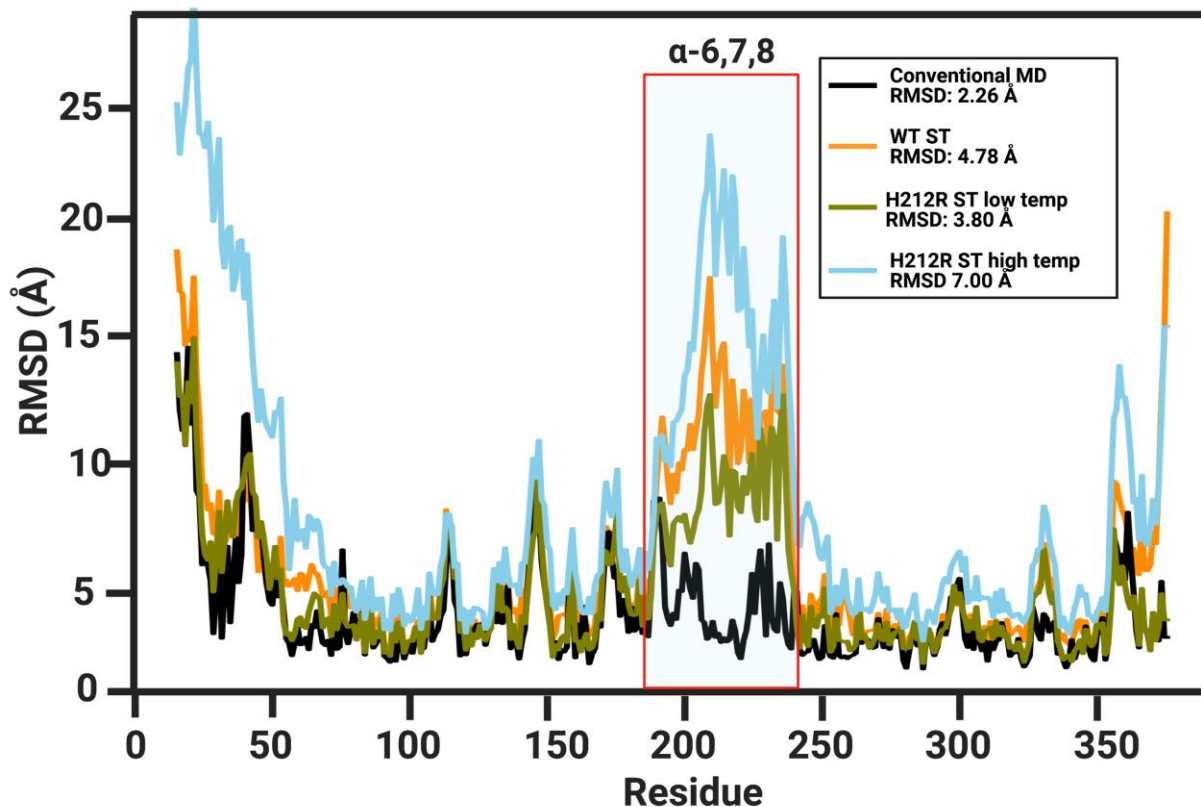

**Supplemental Figure 2:** Trajectory-averaged local  $C_{\alpha}$ -RMSD (Å) for each residue in PhuS for the combined 6 ST runs of WT apo-PhuS (orange), the 5  $\mu$ s conventional MD simulation of WT apo-PhuS (black), the combined 420K and 440K ST runs of H212R apo-PhuS (green), and the combined 520K ST runs of H212R (blue). The average overall  $C_{\alpha}$  RMSD to the starting crystal structure is given in the legend. RMSD values for the wild type ST and the conventional MD were calculated to the 4IMH structure and the RMSD values for the H212R ST low temperature and H212R ST high temperature runs were calculated with respect to the *in silico* H212R structure derived from 4IMH. The region comprising the  $\alpha$ -6,7,8 motif is highlighted with a red box.

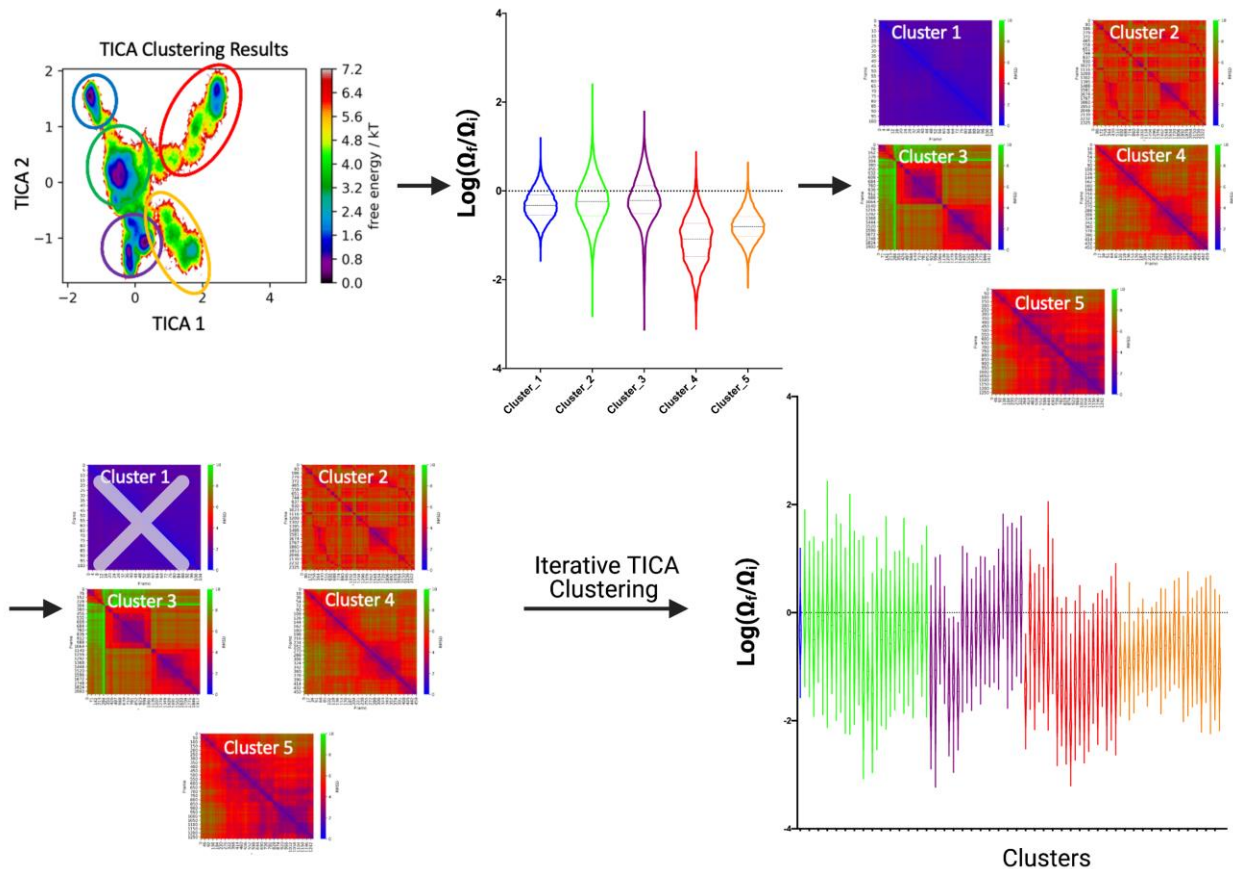

**Supplemental Figure 3:** Workflow incorporating HDXer with iterative clustering through TICA. Initial TICA clustering is performed (top left) and clusters are extracted (colored ellipses). HDXer reassigned weights are applied to each cluster (top middle). A frame-to-frame pairwise RMSD is calculated for each cluster and plotted (top right). When all pairwise RMSD values are  $< 3 \text{ \AA}$ , no further TICA is performed on that cluster (cluster 1, bottom left). The remaining clusters are then further analyzed with iterative TICA clustering until the endpoints are achieved (bottom right).

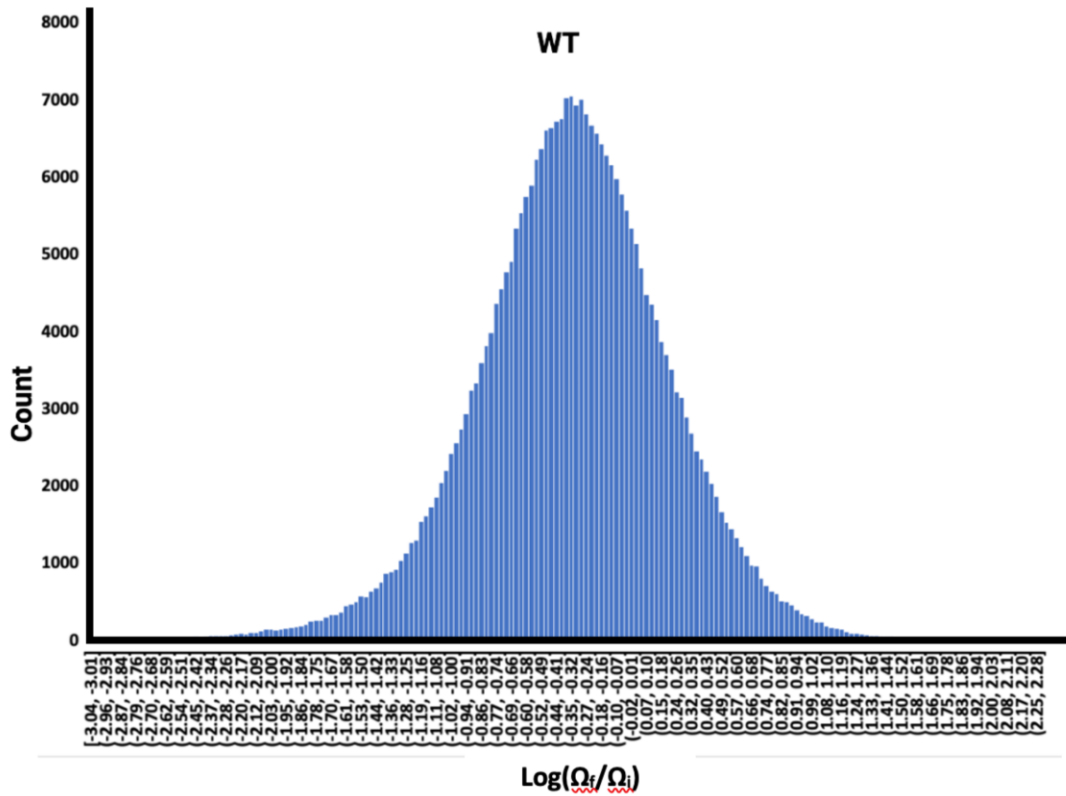

**Supplemental Figure 4:** Histogram of the distribution of the log fold change in weight,  $\log(\Omega_j/\Omega_i)$  for each of the 300,000 reweighted frames resulting from ST of WT apo-PhuS.



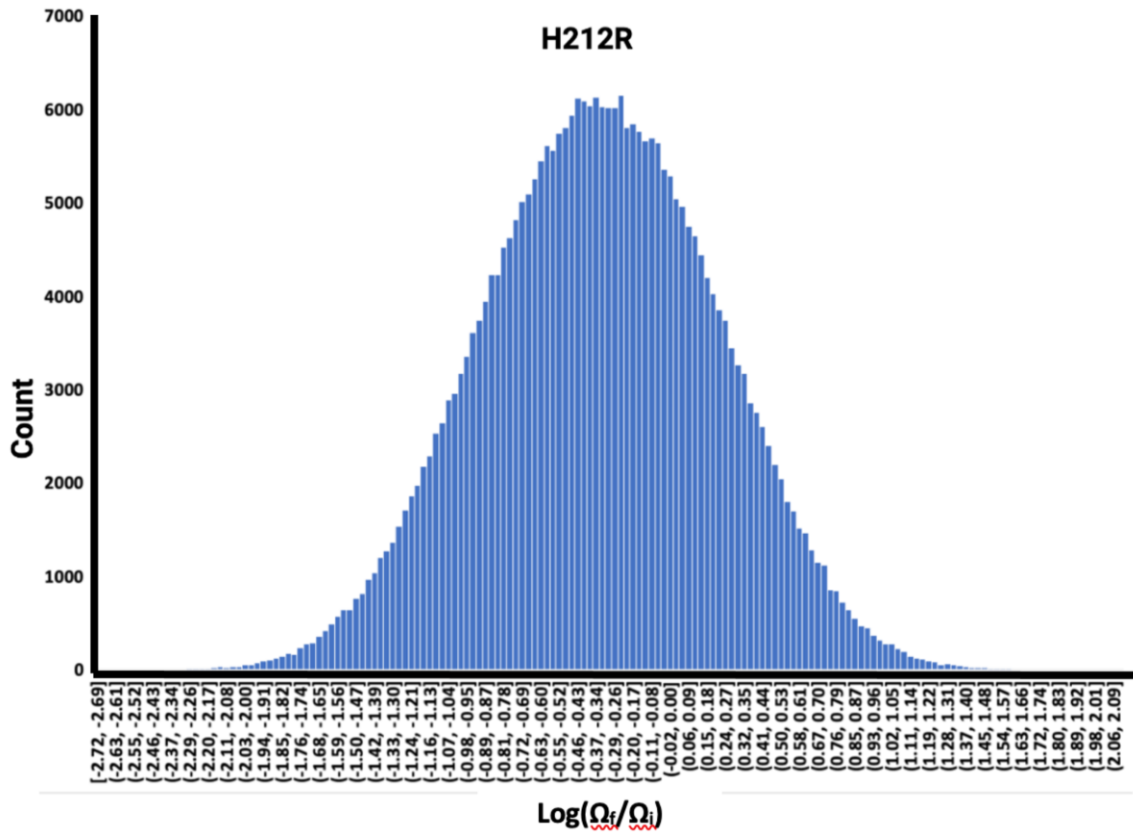

**Supplemental Figure 5:** Histogram of the distribution of the log fold change in weight,  $\log(\Omega_f/\Omega_i)$  for each of the 300,000 reweighted frames resulting from ST of H212R apo-PhuS.

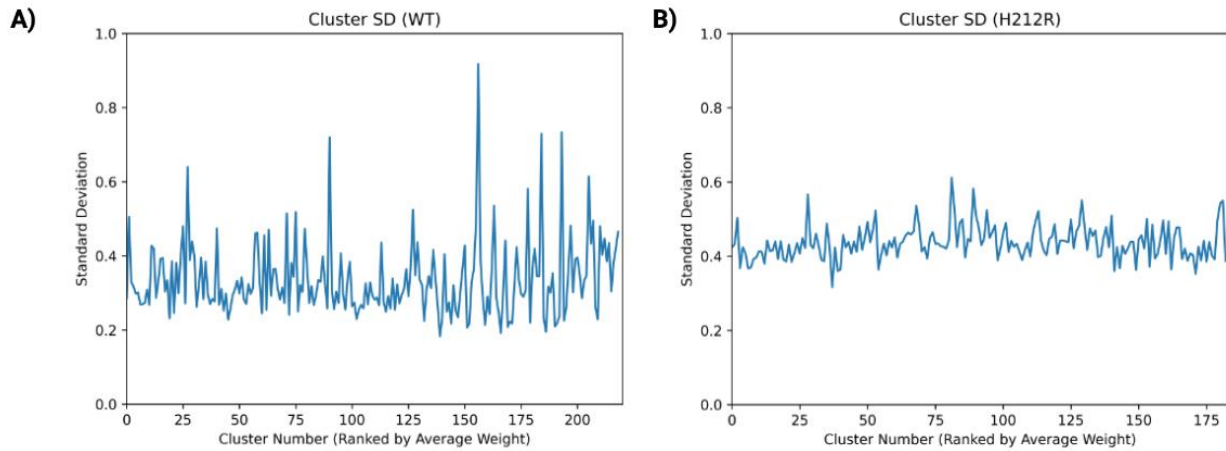

**Supplemental Figure 6:** A) Standard deviation in cluster average  $\log(\Omega_f/\Omega_i)$  plotted for each cluster of WT apo-PhuS. B) Standard deviation in cluster average  $\log(\Omega_f/\Omega_i)$  plotted for each cluster of H212R apo-PhuS.

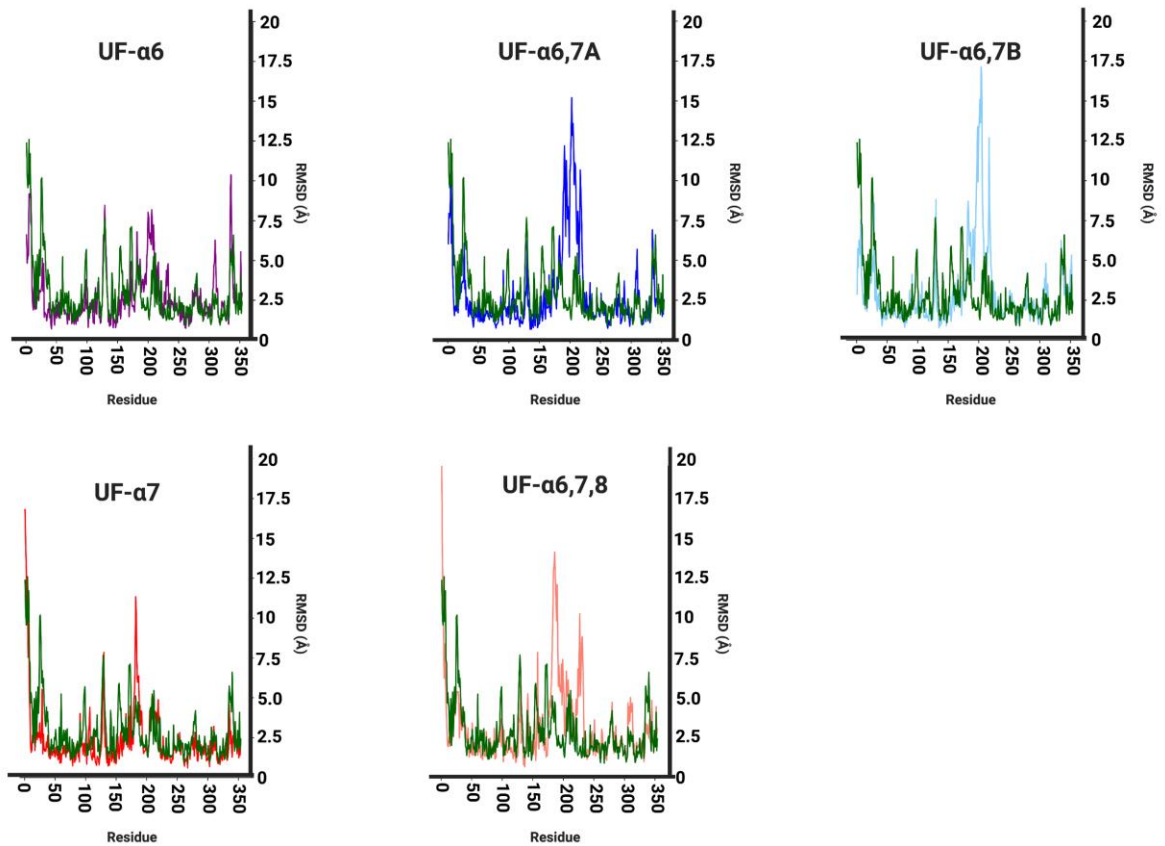

**Supplemental Figure 7:** Trajectory-averaged local  $C_{\alpha}$  RMSD (Å) for the apo-PhuS 5  $\mu$ s simulation (green) versus the trajectory-averaged local  $C_{\alpha}$  RMSD (Å) of the 50 ns unfolded model simulations (UF- $\alpha$ 6: purple, UF- $\alpha$ 6,7A: blue: UF- $\alpha$ 6,7B cyan, UF- $\alpha$ 7: red, UF- $\alpha$ 6,7,8: pink).

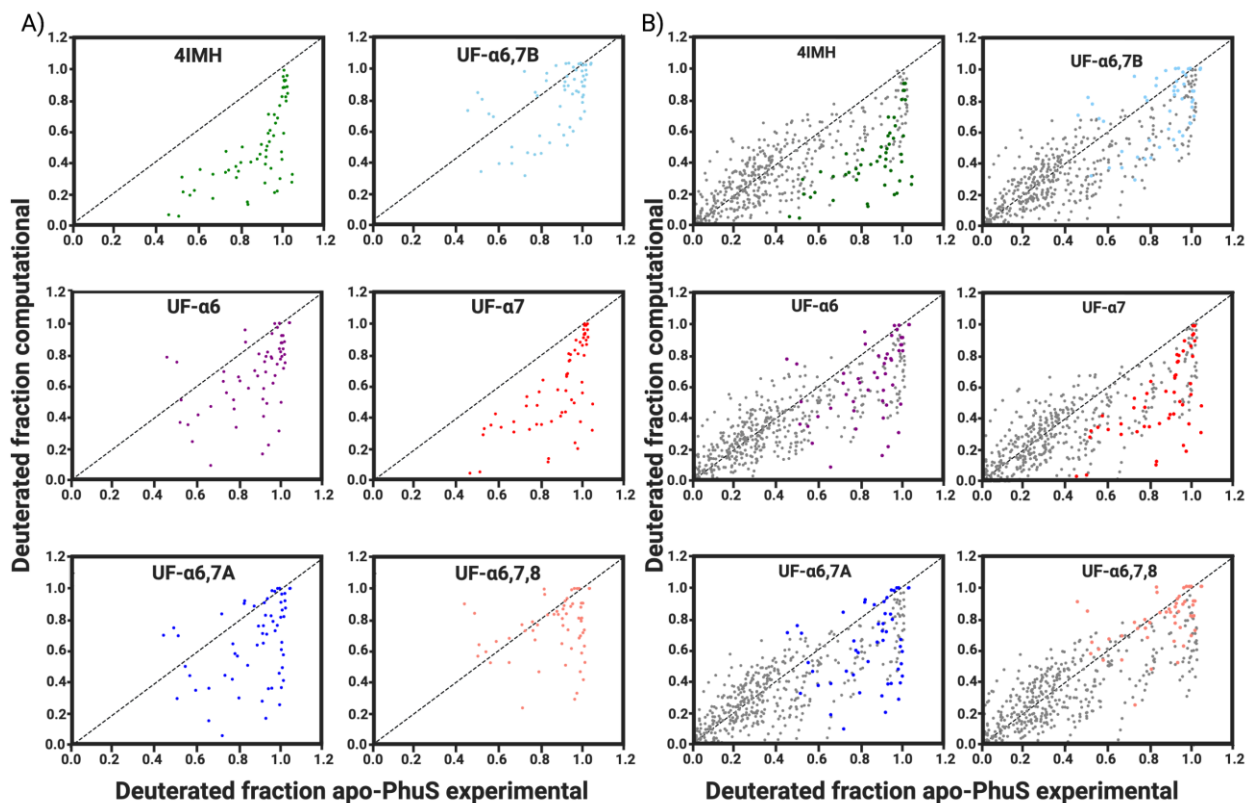

**Supplemental Figure 8:** Correlation between experimental and calculated HDX. A) Plots of the calculated deuterium uptake for each unfolded model and 4IMH (4IMH: green, UF- $\alpha$ 6: purple, UF- $\alpha$ 6,7A: blue: UF- $\alpha$ 6,7B cyan, UF- $\alpha$ 7: red, UF- $\alpha$ 6,7,8: pink) vs. the experimental deuterium uptake for apo-PhuS for all deuterium exposure time points for peptides encompassing the  $\alpha$ -6,7,8 region. B) Plots of calculated deuterium uptake for each unfolded model and 4IMH (4IMH: green, UF- $\alpha$ 6: purple, UF- $\alpha$ 6,7A: blue: UF- $\alpha$ 6,7B cyan, UF- $\alpha$ 7: red, UF- $\alpha$ 6,7,8: pink) vs. the experimental deuterium uptake for apo-PhuS for all deuterium exposure time points for all peptides (gray). Peptides in the  $\alpha$ -6,7,8 region are highlighted in the corresponding model color.

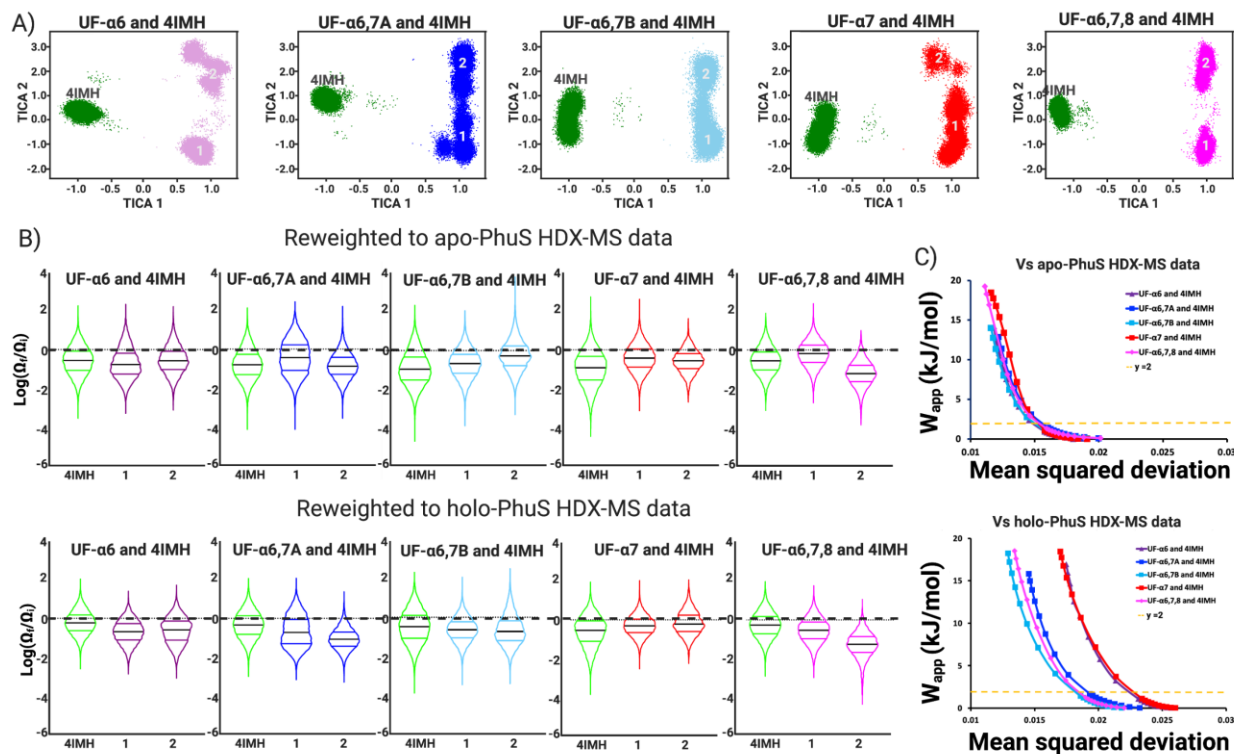

**Supplemental Figure 9:** TICA clustering and HDXer of mixed ensembles of apo-PhuS and locally-unfolded models. A) TICA separation of the mixed ensembles of 4IMH (green) and the locally-unfolded models (UF- $\alpha$ 6: pink, UF- $\alpha$ 6,7A: blue: UF- $\alpha$ 6,7B cyan, UF- $\alpha$ 7: red, UF- $\alpha$ 6,7,8: magenta). B) Violin plots of HDXer weights mapped to the TICA clusters of mixed ensembles reweighted to apo-PhuS experimental data (top) and to holo-PhuS experimental data (bottom). C) Work vs MSD decision plots for the mixed ensembles reweighted to apo-PhuS experimental data (top) and holo-PhuS experimental data (bottom).

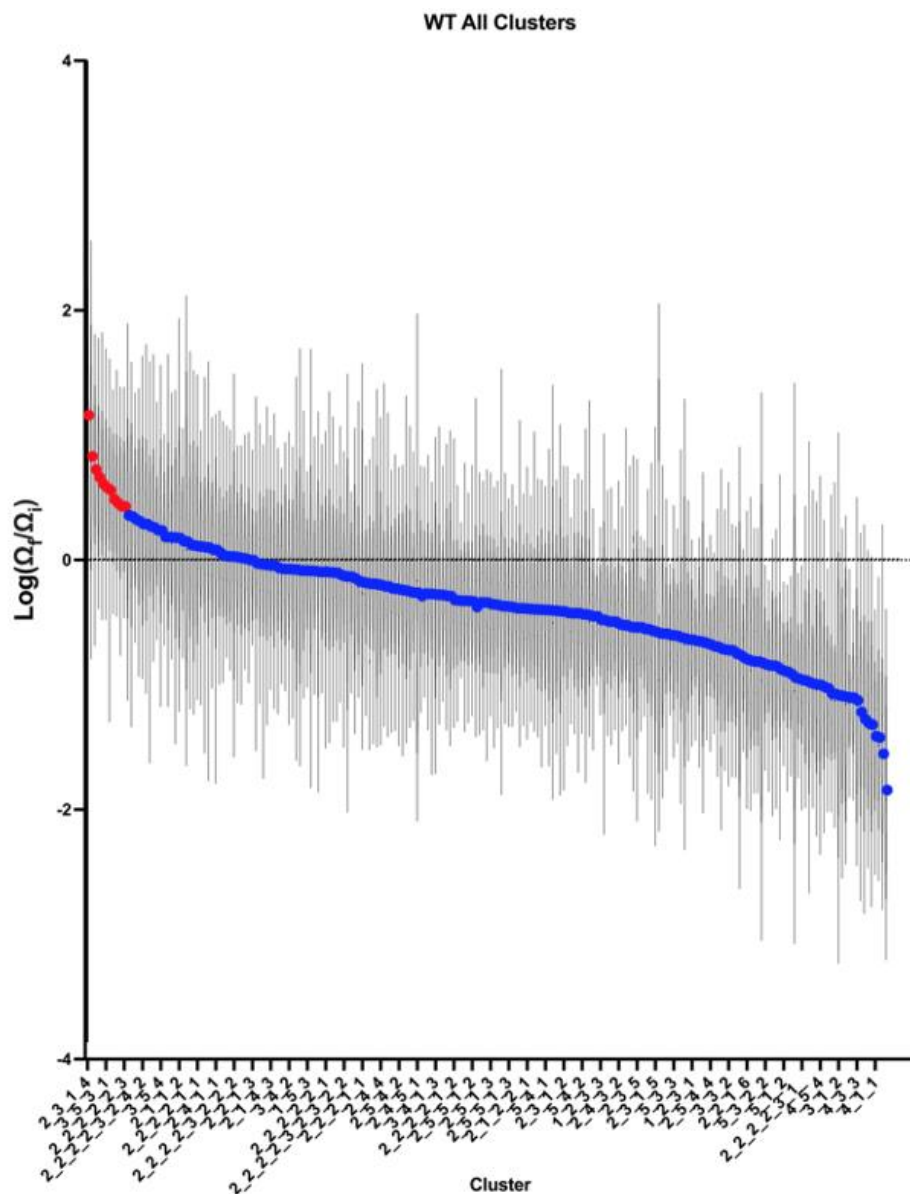

**Supplemental Figure 10:** Violin plots of all 221 endpoint TICA clusters of the WT apo-PhuS ST simulations with HDXer weight reassignment mapped as  $\log(\Omega_f/\Omega_i)$ . The average  $\log(\Omega_f/\Omega_i)$  for each cluster are represented by colored dots (blue or red) with red dots representing the 11 significantly upweighted clusters.

### H212R All Cluster

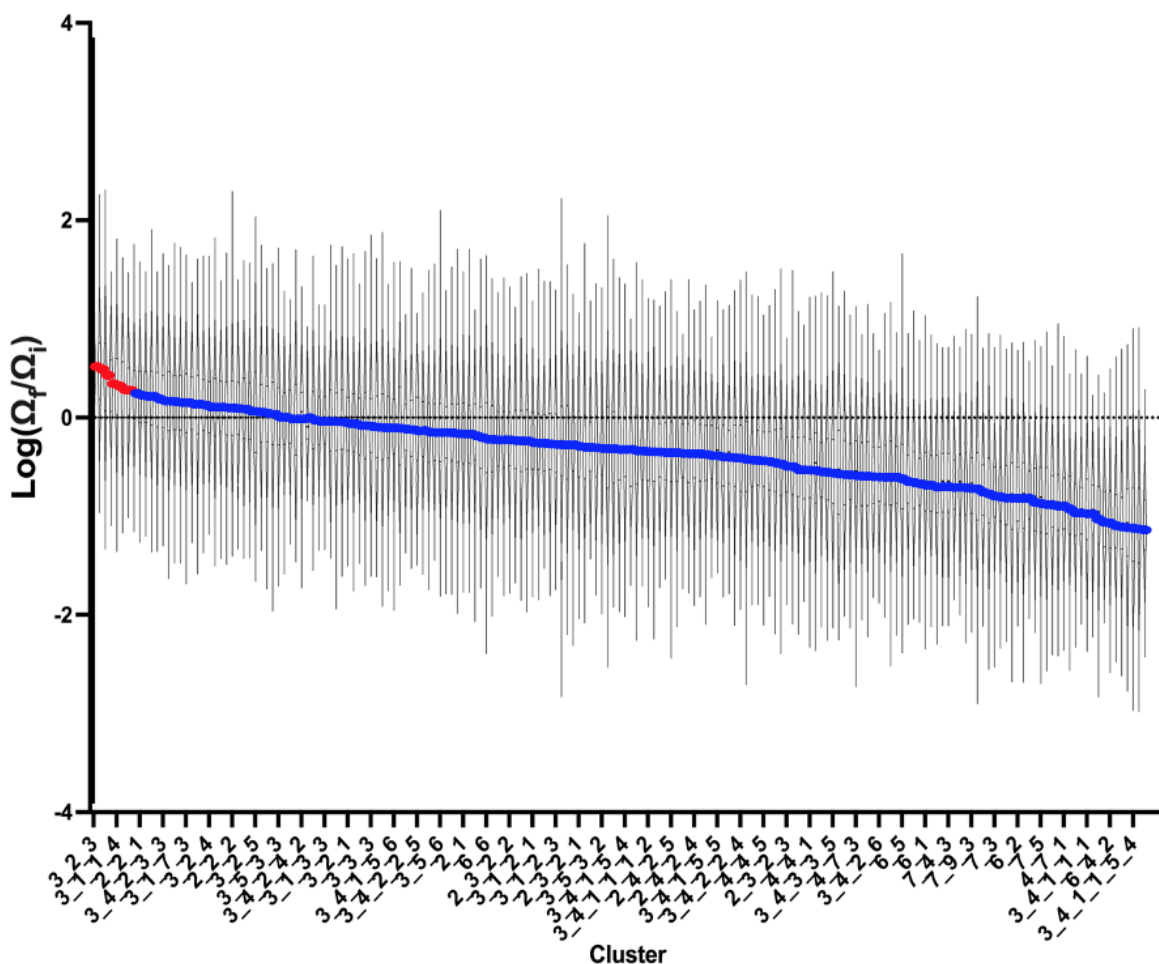

**Supplemental Figure 11:** Violin plots of all 187 endpoint TICA clusters of the H212R apo-PhuS ST simulations with HDXer weight reassignments mapped as  $\log(\Omega_f/\Omega_i)$ . The average  $\log(\Omega_f/\Omega_i)$  for each cluster are represented by colored dots (blue or red) with red dots representing the 7 significantly upweighted clusters.

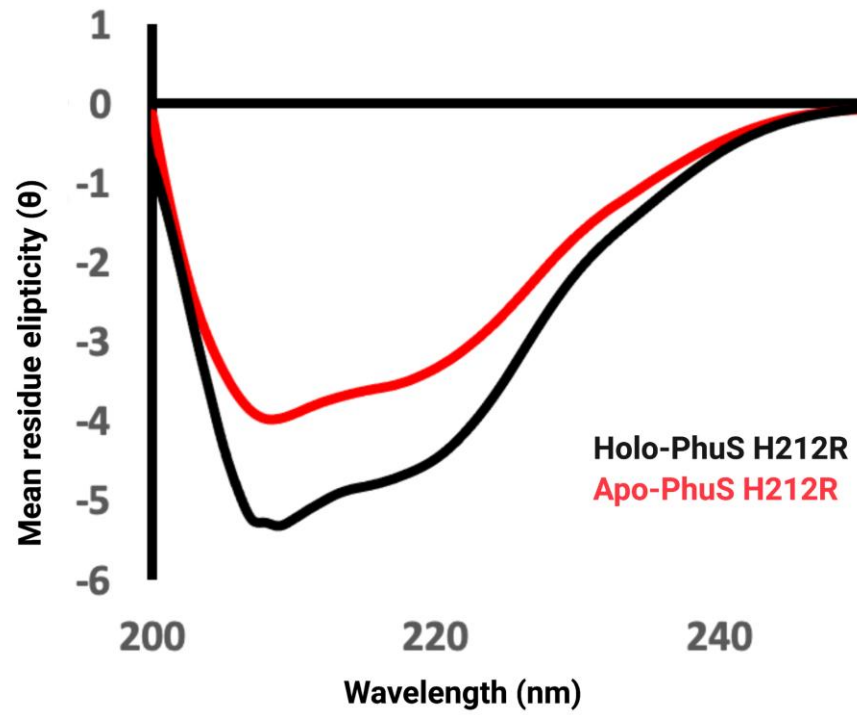

**Supplemental Figure 12:** Experimental CD spectra (mean residue ellipticity) for apo-PhuS H212R (red) and holo-PhuS H212R (black) vs wavelength (nm).

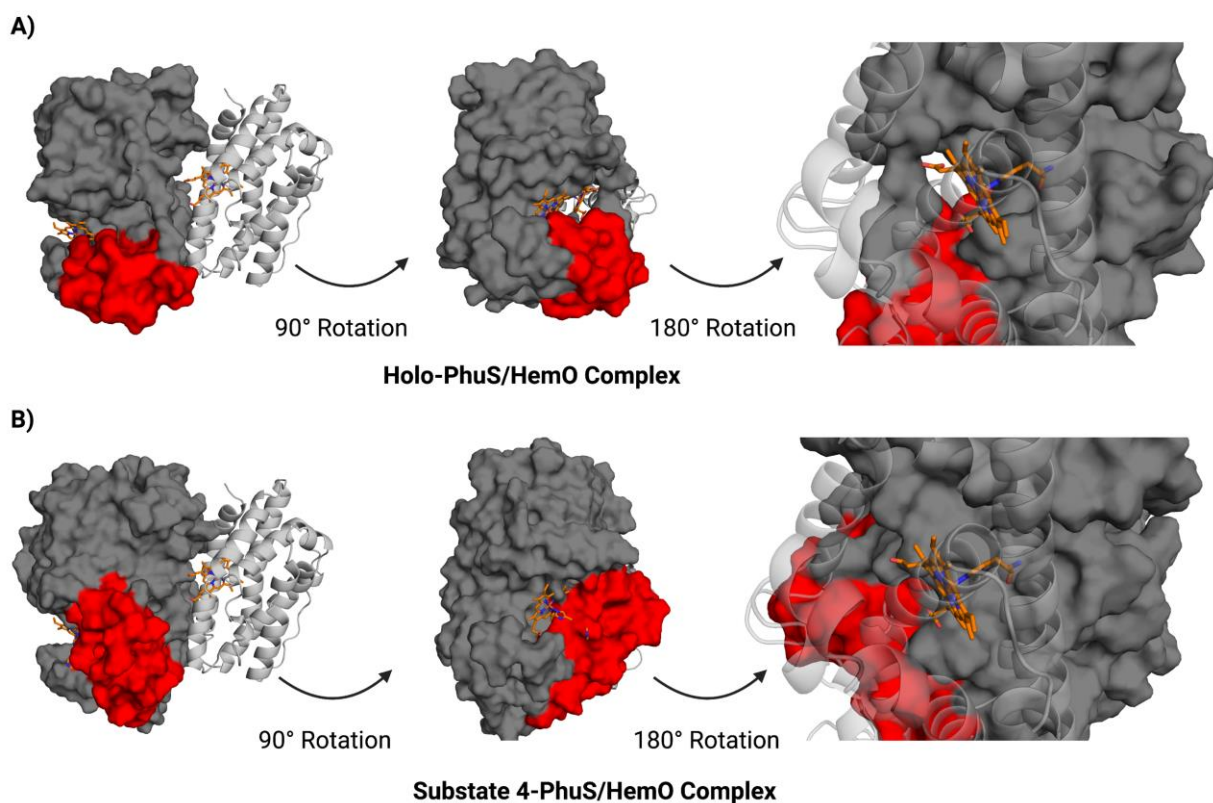

**Supplemental Figure 13:** A) Holo-PhuS/HemO modeled complex with PhuS in surface representation and HemO in cartoon representation, viewing the dimer interface (left), viewed from the PhuS binding pocket (middle, rotated by 90° from initial view) and viewed from the HemO binding pocket (right, rotated by 180° from middle figure) with HemO in transparent rendering.  $\alpha$ -6,7,8 region residues are colored in red. B) Representative frame from substate 4 aligned to holo-PhuS within the holo-PhuS/HemO modeled complex, indicating the effect of the rearrangement of the  $\alpha$ -6,7,8 region (red) on the pathway between the two binding sites. The complex is viewed from the same perspective as in panel A.



| Model name         | RMS error over all peptides | RMS error for peptides in $\alpha$ -6,7,8 region |
|--------------------|-----------------------------|--------------------------------------------------|
| 4imh               | 0.208                       | 0.419                                            |
| UF- $\alpha$ 6     | 0.182                       | 0.281                                            |
| UF- $\alpha$ 6,7A  | 0.191                       | 0.308                                            |
| UF- $\alpha$ 6,7B  | 0.177                       | 0.208                                            |
| UF- $\alpha$ 7     | 0.204                       | 0.345                                            |
| UF- $\alpha$ 6,7,8 | 0.183                       | 0.245                                            |

**Supplemental Table 1:** RMS error of the scatter plot of experimental apo-PhuS deuterium uptake vs. calculated deuterium uptake relative to the line of identity ( $y=x$ ) for all peptides (left) or only peptides in the  $\alpha$ -6,7,8 region (right) at all timepoints for each locally-unfolded model.

| Cluster             | Log( $\Omega_f/\Omega_i$ ) | Number of Frames |
|---------------------|----------------------------|------------------|
| 2_3_1_4             | 1.159685171                | 333              |
| 2_2_2_1_2           | 0.828684706                | 900              |
| 3_5_5_7             | 0.722032256                | 1266             |
| 2_2_2_2_3_2_3_3_3   | 0.658970357                | 575              |
| 3_5_1               | 0.605141263                | 1926             |
| 3_5_3_1             | 0.576709561                | 974              |
| 3_5_5_6             | 0.555782211                | 1142             |
| 3_5_5_4             | 0.482374827                | 279              |
| 3_5_5_1             | 0.452328138                | 1001             |
| 2_2_2_2_3_2_3_3_2_1 | 0.425696715                | 541              |
| 2_2_2_2_2_3         | 0.425121385                | 940              |
| 2_2_2_2_3_3         | 0.352027071                | 1117             |
| 2_2_2_2_3_2_        | 0.343332014                | 1022             |
| 3_5_5_3             | 0.319061236                | 865              |
| 2_2_2_2_3_2_3_3_2_3 | 0.304776502                | 740              |
| 2_2_2_2_3_2_4_2     | 0.283623325                | 1081             |
| 2_2_2_2_3_2_3_4     | 0.282589695                | 555              |
| 2_5_5_2             | 0.263253536                | 2198             |
| 2_2_2_2_3_2_2_      | 0.255366161                | 929              |
| 3_5_3_3_4           | 0.232936303                | 2403             |
| 3_5_4               | 0.23085644                 | 6846             |
| 3_4_1_1             | 0.178388473                | 558              |
| 2_2_2_2_3_2_4       | 0.177578272                | 3585             |
| 2_2_2_2_3_2_4_1     | 0.176003191                | 692              |
| 2_1_2_3             | 0.173951671                | 1503             |
| 2_1_1_2             | 0.169558871                | 1802             |
| 2_2_2_2_3_2_3_3_1   | 0.143741463                | 682              |
| 2_3_1_3             | 0.141387786                | 1181             |
| 2_2_2_2_3_2_4_3     | 0.114692749                | 1811             |
| 2_1_1_1             | 0.110739791                | 519              |
| 2_2_2_2_1_1         | 0.105040578                | 359              |
| 2_2_2_2_3_2_3_2_1   | 0.102201496                | 1005             |
| 2_2_2_2_3_2_3_3_2_2 | 0.096141048                | 973              |
| 3_5_2               | 0.092359268                | 2544             |
| 3_5_3_3_2           | 0.076146278                | 2963             |
| 2_4_1_1             | 0.074570785                | 894              |
| 3_5_5_2             | 0.052272988                | 842              |
| 3_5_5_5             | 0.028855101                | 1339             |

|                   |             |      |
|-------------------|-------------|------|
| 2_2_2_2_1_3       | 0.023049533 | 827  |
| 2_5_1_2           | 0.021637988 | 701  |
| 2_2_2_2_3_2_2_2   | 0.020924281 | 856  |
| 2_5_3             | 0.01467007  | 1303 |
| 2_4_5_3           | 0.009117217 | 948  |
| 3_5_3_3_1         | 0.003914447 | 772  |
| 2_2_2_2_3_2_2_3   | -0.0064953  | 949  |
| 2_2_1_3           | -0.0077613  | 472  |
| 2_2_1_2           | -0.0342666  | 1837 |
| 1_3_6             | -0.0387576  | 2060 |
| 2_2_2_3_1         | -0.0424393  | 1745 |
| 2_2_1_7           | -0.0475926  | 1175 |
| 2_1_4_3           | -0.0499468  | 802  |
| 3_3_1_3           | -0.0522987  | 674  |
| 3_5_5_8           | -0.0702254  | 598  |
| 1_3_7             | -0.0777378  | 2032 |
| 2_2_2_2_3_2_3_1   | -0.0791489  | 613  |
| 3_4_2             | -0.0793532  | 5560 |
| 2_1_2_1_3         | -0.0829196  | 446  |
| 2_2_2_3_3         | -0.084026   | 1274 |
| 2_2_2_2_2_2       | -0.0915298  | 486  |
| 1_2_1             | -0.092003   | 1745 |
| 1_5_3             | -0.0924104  | 1591 |
| 2_2_2_3_2         | -0.0944764  | 1947 |
| 2_1_2_1_2         | -0.0955465  | 491  |
| 2_4_3_4           | -0.1012385  | 2140 |
| 2_5_2_3           | -0.101383   | 550  |
| 2_2_2_2_2_1       | -0.1018841  | 558  |
| 2_1_2_1_1         | -0.1061136  | 1063 |
| 2_1_4_2           | -0.1080687  | 952  |
| 2_1_1_4           | -0.1098821  | 368  |
| 3_5_3_3_3         | -0.1265235  | 2714 |
| 2_2_2_2_3_2_3_2_2 | -0.1366772  | 435  |
| 2_5_5_3           | -0.1406756  | 1719 |
| 1_5_1             | -0.1424804  | 279  |
| 2_3_2_2           | -0.1577683  | 2589 |
| 2_2_2_2_3_2_3_2_3 | -0.1772616  | 576  |
| 2_2_2_1_1         | -0.1852846  | 787  |
| 3_3_1_1           | -0.1911668  | 2789 |

|             |            |       |
|-------------|------------|-------|
| 2_2_2_2_4_4 | -0.1974706 | 1908  |
| 2_2_1_1     | -0.1981641 | 2763  |
| 2_4_1_6     | -0.2022959 | 779   |
| 2_4_4       | -0.2085109 | 1945  |
| 2_1_1_3     | -0.2181652 | 749   |
| 3_4_5       | -0.2189228 | 6052  |
| 1_4_5       | -0.2355828 | 2697  |
| 3_3_3_2     | -0.2374482 | 1084  |
| 2_5_4_2     | -0.2425773 | 605   |
| 2_1_2_2_2   | -0.2487356 | 807   |
| 1_1_2       | -0.2533086 | 601   |
| 2_2_1_4     | -0.2637666 | 761   |
| 3_4_4       | -0.2680286 | 9252  |
| 2_4_5_1     | -0.2700271 | 500   |
| 1_1_1       | -0.277364  | 211   |
| 1_5_4       | -0.2790205 | 442   |
| 3_3_3       | -0.2794899 | 1938  |
| 2_5_2_2     | -0.2836817 | 1740  |
| 3_4_1_3     | -0.2865318 | 1402  |
| 3_1_3       | -0.289236  | 3386  |
| 1_4_1       | -0.2949457 | 2337  |
| 1_3_3       | -0.2967328 | 4668  |
| 2_5_1_1     | -0.2980379 | 2080  |
| 2_2_2_2_1_2 | -0.3283641 | 1555  |
| 1_2_2       | -0.3310032 | 983   |
| 1_5_2       | -0.3343294 | 66    |
| 3_4_3       | -0.3347847 | 4944  |
| 2_1_4_1     | -0.3353318 | 511   |
| 2_5_5_1_2   | -0.3385499 | 1915  |
| 3_5_3_2     | -0.3447794 | 10256 |
| 1_3_1       | -0.3478895 | 3214  |
| 1_2_4_2     | -0.3482753 | 1665  |
| 2_4_3_3     | -0.348995  | 1931  |
| 2_5_1_3     | -0.361528  | 2976  |
| 5_4_5       | -0.363708  | 893   |
| 2_5_5_1_1   | -0.3702563 | 1104  |
| 2_3_2_3     | -0.3767906 | 925   |
| 3_3_3_1     | -0.3788784 | 449   |
| 2_5_5_1_3   | -0.3823608 | 1188  |

|                 |            |      |
|-----------------|------------|------|
| 1_2_4_1         | -0.3856093 | 2947 |
| 1_3_4           | -0.3943613 | 617  |
| 1_3_5           | -0.395284  | 1393 |
| 2_4_5_4         | -0.3962294 | 1227 |
| 2_1_2_2_1       | -0.3997725 | 945  |
| 1_4_2           | -0.402876  | 1045 |
| 2_5_4_1         | -0.4035032 | 866  |
| 2_2_2_2_4_1     | -0.4050916 | 1386 |
| 5_5_5           | -0.4071344 | 411  |
| 5_4_1           | -0.4080798 | 455  |
| 2_4_1_3         | -0.4102279 | 853  |
| 2_1_3           | -0.414754  | 522  |
| 2_5_1_4         | -0.415422  | 433  |
| 2_2_2_2_3_2_3_5 | -0.4202175 | 1347 |
| 2_3_1_2         | -0.4209303 | 1122 |
| 2_2_1_5         | -0.4324502 | 376  |
| 1_2_4_3         | -0.4340968 | 1282 |
| 2_3_1_1         | -0.4349568 | 827  |
| 3_3_1_2         | -0.4349842 | 2483 |
| 5_4_2           | -0.4437877 | 580  |
| 2_2_3_1         | -0.4444573 | 863  |
| 2_5_4_3         | -0.4517748 | 1289 |
| 3_4_1_2         | -0.4597299 | 798  |
| 1_3_2           | -0.4611876 | 38   |
| 1_2_3_3         | -0.487132  | 417  |
| 3_1_2_2         | -0.4897209 | 1236 |
| 1_4_3           | -0.5007569 | 2283 |
| 2_4_3_1         | -0.5021891 | 2634 |
| 5_3_2_5         | -0.5038424 | 1121 |
| 2_4_3_2         | -0.5234033 | 487  |
| 1_2_3_2         | -0.5310625 | 1464 |
| 3_5_3_3_5       | -0.5316096 | 2088 |
| 2_2_3_4         | -0.5437825 | 3820 |
| 2_4_1_4         | -0.5484894 | 677  |
| 2_3_5           | -0.5486208 | 2153 |
| 5_3_1           | -0.549904  | 394  |
| 1_2_3_4         | -0.5607341 | 723  |
| 2_4_5_2         | -0.5649412 | 633  |
| 2_4_2           | -0.5762641 | 1853 |

|               |            |      |
|---------------|------------|------|
| 2_3_1_5       | -0.5832398 | 1628 |
| 2_4_1_5       | -0.5958404 | 268  |
| 5_5_1         | -0.5992203 | 627  |
| 3_1_4         | -0.5999336 | 2834 |
| 1_4_4         | -0.6119515 | 106  |
| 5_3_3         | -0.6130941 | 2616 |
| 5_2_4         | -0.6183952 | 413  |
| 4_5_1         | -0.6307067 | 1183 |
| 2_2_3_7       | -0.6377364 | 2342 |
| 5_3_2_6       | -0.6473835 | 1061 |
| 1_2_3_1       | -0.6478129 | 465  |
| 5_3_4         | -0.6570648 | 950  |
| 5_3_2_4       | -0.6619375 | 1142 |
| 2_2_3_5       | -0.6672568 | 577  |
| 5_2_6         | -0.6771615 | 1440 |
| 2_5_4_4       | -0.6884291 | 1741 |
| 5_3_2_1       | -0.7008723 | 836  |
| 4_5_2         | -0.7057492 | 803  |
| 2_4_1_2       | -0.7213624 | 378  |
| 5_5_3         | -0.7279607 | 148  |
| 3_3_2         | -0.7323867 | 2956 |
| 2_5_1_5       | -0.7351061 | 1131 |
| 5_5_2         | -0.7597704 | 451  |
| 4_5_5         | -0.7704541 | 733  |
| 5_2_3         | -0.793405  | 1239 |
| 2_2_1_6       | -0.8077498 | 442  |
| 2_5_2_1       | -0.8176149 | 934  |
| 2_2_2_2_3_1_3 | -0.8237756 | 350  |
| 2_2_2_2_3_1_2 | -0.8237756 | 350  |
| 3_2           | -0.8336905 | 1143 |
| 5_3_2_2       | -0.8472769 | 317  |
| 5_1_4         | -0.8543315 | 1405 |
| 4_4_3         | -0.8568503 | 439  |
| 2_2_2_2_4_2   | -0.8638472 | 2427 |
| 5_6_1         | -0.8874862 | 1370 |
| 5_1_2         | -0.8981713 | 2889 |
| 5_2_2         | -0.9081168 | 588  |
| 5_2_5         | -0.9250898 | 898  |
| 2_3_4         | -0.9537962 | 1031 |

|               |            |      |
|---------------|------------|------|
| 2_2_2_2_4_3   | -0.9621251 | 260  |
| 2_2_2_2_3_1_2 | -0.9720378 | 593  |
| 5_6_2         | -0.976235  | 494  |
| 3_1_2_1       | -0.9930389 | 1970 |
| 5_1_3         | -1.0018327 | 1094 |
| 5_5_4         | -1.0093478 | 598  |
| 4_5_4         | -1.0128579 | 836  |
| 5_6_3         | -1.0281646 | 1429 |
| 5_4_3         | -1.0405811 | 715  |
| 2_3_2_1       | -1.0821042 | 1159 |
| 2_2_2_1_3     | -1.0857006 | 755  |
| 3_1_2         | -1.0967875 | 7455 |
| 4_5_3         | -1.1003722 | 1455 |
| 4_4_4         | -1.1084928 | 273  |
| 5_3_2_3       | -1.1118242 | 363  |
| 5_2_1         | -1.1157271 | 1525 |
| 4_3_3         | -1.1359068 | 328  |
| 4_3_2         | -1.2288698 | 411  |
| 4_1_2         | -1.2865568 | 570  |
| 4_1_3         | -1.317961  | 232  |
| 4_4_1         | -1.3324284 | 648  |
| 4_1_1         | -1.4244904 | 251  |
| 4_4_2         | -1.4356977 | 506  |
| 4_2           | -1.5671043 | 702  |
| 4_3_1         | -1.857777  | 511  |

**Supplemental Table 2:** The results of iterative TICA clustering of the wild type apo-PhuS ST simulations ranked by  $\log(\Omega_j/\Omega_i)$  following HDXer ensemble reweighting with the 11 significantly upweighted clusters highlighted in yellow. Clusters are named so that the first number is the parent cluster and the last number is the final sub cluster. Weights reassigned by HDXer are used to calculate  $\log(\Omega_j/\Omega_i)$  and are averaged over all the frames of a given cluster. The number of frames that comprise each cluster is listed.

| Cluster   | $\text{Log}(\Omega_j/\Omega_i)$ | Number of Frames |
|-----------|---------------------------------|------------------|
| 3_2_3     | 0.49807073                      | 608              |
| 2_2_3     | 0.472860251                     | 1308             |
| 2_2_4     | 0.413082691                     | 910              |
| 3_4_2_2_1 | 0.330872922                     | 509              |
| 3_1_1_4   | 0.310030939                     | 2081             |
| 3_4_2_3_4 | 0.271193672                     | 933              |
| 3_1_1_5   | 0.266516819                     | 1731             |
| 3_6_1     | 0.236449334                     | 4501             |
| 2_2_1     | 0.216716694                     | 860              |
| 3_6_2     | 0.207983887                     | 1118             |
| 3_4_2_3_2 | 0.207141341                     | 1260             |
| 3_4_2_2_2 | 0.180919524                     | 956              |
| 3_4_2_3_3 | 0.163398618                     | 827              |
| 3_1_7_2   | 0.161408648                     | 1424             |
| 3_6_4     | 0.154579639                     | 1775             |
| 3_6_3_3   | 0.148749265                     | 1744             |
| 3_1_7_3   | 0.146892755                     | 1151             |
| 2_2_6     | 0.133448491                     | 500              |
| 3_4_2_4_1 | 0.132715101                     | 1619             |
| 2_2_8     | 0.122732095                     | 1506             |
| 3_2_4     | 0.10367551                      | 1450             |
| 3_1_1_3   | 0.103485418                     | 425              |
| 3_1_7_1   | 0.102351675                     | 690              |
| 3_4_2_3_1 | 0.096880772                     | 1692             |
| 2_2_2     | 0.093804023                     | 1617             |
| 3_1_3_4   | 0.088185887                     | 870              |
| 3_4_2_3_5 | 0.083296565                     | 1170             |
| 3_1_5_3   | 0.063828727                     | 1739             |
| 3_2_5     | 0.05841897                      | 861              |
| 3_6_3_1   | 0.050437836                     | 737              |
| 2_2_5     | 0.039794885                     | 1557             |
| 3_1_8_3   | 0.034610694                     | 1526             |
| 3_5_3_3   | 0.004816866                     | 4736             |
| 3_4_2_4_3 | 0.002121369                     | 491              |
| 3_1_2_6   | -0.007166977                    | 177              |
| 3_2_2     | -0.010684868                    | 853              |
| 3_4_2_4_2 | -0.012374399                    | 90               |



|                 |              |      |
|-----------------|--------------|------|
| 2_2_7           | -0.012494348 | 16   |
| 3_1_1_2         | -0.025810114 | 1472 |
| 3_1_2_7         | -0.035292873 | 1256 |
| 3_1_3_3         | -0.036658668 | 1389 |
| 3_1_5_1         | -0.037478289 | 768  |
| 3_1_8_2         | -0.038631354 | 1727 |
| 3_4_2_2_3       | -0.04237942  | 871  |
| 3_2_1           | -0.054477818 | 839  |
| 3_5_3_4         | -0.058213049 | 5165 |
| 3_4_1_1_1_5     | -0.076809011 | 582  |
| 3_4_1_6         | -0.077739738 | 1443 |
| 3_3_3           | -0.085978894 | 2452 |
| 3_1_2_5         | -0.091543582 | 1132 |
| 3_4_2_3_6       | -0.096842251 | 1638 |
| 3_1_5_2         | -0.097842583 | 2109 |
| 3_4_1_5_6       | -0.102633046 | 615  |
| 3_4_1_5_3       | -0.107123278 | 212  |
| 3_1_8_1         | -0.112868552 | 789  |
| 3_4_1_1_5_2_2_4 | -0.11703231  | 534  |
| 3_4_2_2_5       | -0.120555647 | 64   |
| 3_1_1_1         | -0.125621361 | 2216 |
| 3_5_1           | -0.140820683 | 956  |
| 2_4_2_1         | -0.14338153  | 498  |
| 3_5_6           | -0.143655494 | 2686 |
| 3_4_1_1_1_4     | -0.144739821 | 659  |
| 3_4_1_4         | -0.148573546 | 3884 |
| 3_4_2_5         | -0.155771241 | 2636 |
| 2_1             | -0.158174509 | 1670 |
| 3_4_1_1_1_3     | -0.160938024 | 855  |
| 2_4_2_2         | -0.176517375 | 290  |
| 3_1_3_2         | -0.194169132 | 1480 |
| 6_6             | -0.208541297 | 1634 |
| 3_3_5           | -0.21041343  | 1465 |
| 3_1_3_1         | -0.216279695 | 870  |
| 3_4_1_3         | -0.216722665 | 2065 |
| 2_3_2_2         | -0.217741668 | 1257 |
| 3_4_3_3_3       | -0.224308587 | 252  |
| 3_5_2_4         | -0.226485166 | 1736 |
| 3_5_4           | -0.227650709 | 4612 |

|                 |              |      |
|-----------------|--------------|------|
| 3_1_2_1         | -0.245069448 | 754  |
| 2_4_1           | -0.248642723 | 1694 |
| 3_4_1_5_2       | -0.250279714 | 450  |
| 3_4_1_1_5_2_2_1 | -0.256902955 | 907  |
| 3_1_2_3         | -0.258803873 | 789  |
| 3_4_1_1_5_1     | -0.263818909 | 1765 |
| 3_3_4           | -0.265024114 | 696  |
| 3_3_2           | -0.265716879 | 1557 |
| 2_3_2_1         | -0.280180354 | 645  |
| 3_4_1_1_5_2_2_2 | -0.287551183 | 1805 |
| 3_4_3_3_4       | -0.289713334 | 349  |
| 3_5_2_1         | -0.293471951 | 1228 |
| 3_5_3_2         | -0.299380085 | 1589 |
| 3_4_3_1         | -0.302832301 | 8474 |
| 3_4_3_2_3       | -0.303408531 | 1068 |
| 3_5_3_1         | -0.309877529 | 2437 |
| 3_4_1_5_4       | -0.310411116 | 2370 |
| 4_5             | -0.317435085 | 38   |
| 3_4_3_2_1       | -0.323098297 | 1223 |
| 3_4_3_2_2       | -0.323276291 | 1200 |
| 3_4_1_1_1_2     | -0.332233792 | 824  |
| 3_4_1_1_5_2_4   | -0.33396777  | 392  |
| 3_3_1           | -0.335297225 | 2725 |
| 3_4_2_1         | -0.339790206 | 918  |
| 2_4_2_5         | -0.340088883 | 381  |
| 2_4_3           | -0.344030246 | 289  |
| 3_1_2_4         | -0.346938089 | 643  |
| 3_1_2_2         | -0.348864414 | 1050 |
| 2_4_2_4         | -0.348944836 | 435  |
| 2_3_1           | -0.353872712 | 606  |
| 3_5_5           | -0.357904136 | 8110 |
| 2_3_4           | -0.366410936 | 169  |
| 3_4_1_5_5       | -0.372238863 | 245  |
| 3_4_1_1_5_2_2_3 | -0.38136456  | 397  |
| 2_4_2_3         | -0.389141735 | 389  |
| 3_4_1_1_1_1     | -0.391314385 | 1244 |
| 3_4_2_2_4       | -0.396614016 | 621  |
| 3_4_3_3_1       | -0.408621065 | 1574 |
| 3_4_1_1_1_6     | -0.411817324 | 672  |

|               |              |       |
|---------------|--------------|-------|
| 3_4_1_1_6     | -0.418441904 | 1650  |
| 4_4_5         | -0.420833345 | 1956  |
| 4_4_6         | -0.426406809 | 321   |
| 2_3_3         | -0.440385602 | 5924  |
| 1             | -0.451943098 | 33485 |
| 2_3_2_3       | -0.4745489   | 762   |
| 3_6_3_2       | -0.477580061 | 2166  |
| 3_4_1_5_1     | -0.506476834 | 1243  |
| 7_9_1         | -0.508221244 | 631   |
| 4_4_1         | -0.510851413 | 1774  |
| 3_4_3_3_2     | -0.514355331 | 331   |
| 3_4_1_2       | -0.527064037 | 11674 |
| 3_4_1_1_5_2_1 | -0.533090984 | 1682  |
| 3_4_3_3_5     | -0.54094937  | 1220  |
| 4_6           | -0.54950379  | 1506  |
| 3_4_1_1_5_2_3 | -0.553754386 | 1153  |
| 2_3_2_4       | -0.557475801 | 1385  |
| 4_7_3         | -0.565141908 | 3573  |
| 6_4_1         | -0.571939696 | 680   |
| 3_5_2_2       | -0.572051286 | 2134  |
| 4_4_3         | -0.576220944 | 616   |
| 3_4_2_6       | -0.577199471 | 462   |
| 3_5_2_3       | -0.579537651 | 683   |
| 3_4_1_1_5_3   | -0.579560346 | 889   |
| 7_9_4         | -0.580737211 | 497   |
| 6_5           | -0.597405836 | 448   |
| 4_4_7         | -0.623585612 | 3707  |
| 4_4_4         | -0.63200861  | 1028  |
| 4_4_8         | -0.644112762 | 1713  |
| 6_1           | -0.65605816  | 5807  |
| 4_4_2         | -0.658088036 | 553   |
| 7_9_2         | -0.671873297 | 365   |
| 7_4_4         | -0.672962628 | 466   |
| 7_4_3         | -0.672962628 | 466   |
| 4_1_2         | -0.680308267 | 1338  |
| 7_8           | -0.681981762 | 239   |
| 6_4_3         | -0.683880725 | 507   |
| 7_9_3         | -0.690399771 | 1164  |
| 3_4_3_3_6     | -0.695362055 | 1854  |

|             |              |      |
|-------------|--------------|------|
| 4_3         | -0.726242142 | 2650 |
| 6_4         | -0.743527733 | 1944 |
| 7_3         | -0.764027385 | 572  |
| 7_1         | -0.772557573 | 3294 |
| 7_2         | -0.782634763 | 334  |
| 7_4_2       | -0.785363813 | 617  |
| 6_2         | -0.785539983 | 706  |
| 7_6         | -0.787230643 | 538  |
| 4_1_1       | -0.787512281 | 762  |
| 7_4_1       | -0.82481582  | 545  |
| 7_5         | -0.835327443 | 868  |
| 4_1_4       | -0.850575196 | 736  |
| 4_8         | -0.861562342 | 1205 |
| 4_7_1       | -0.862381542 | 765  |
| 4_9_2       | -0.888350156 | 539  |
| 4_9_3       | -0.92581328  | 1062 |
| 4_1_3       | -0.931040438 | 1071 |
| 3_4_1_1_1   | -0.935215004 | 633  |
| 4_9_4       | -0.939680691 | 598  |
| 3_4_1_1_2   | -0.989277132 | 790  |
| 4_9_1       | -1.02013386  | 443  |
| 6_4_2       | -1.026938744 | 498  |
| 4_2         | -1.052067352 | 2939 |
| 4_7_2       | -1.063832626 | 3940 |
| 7_7         | -1.06730495  | 246  |
| 3_4_1_1_5_4 | -1.077814072 | 1106 |
| 3_4_1_1_3   | -1.085304573 | 963  |
| 4_10        | -1.09379047  | 1752 |

**Supplemental Table 3:** The results of iterative TICA clustering of the H212R apo PhuS ST simulations ranked by  $\log(\Omega_j/\Omega_i)$  following HDXer ensemble reweighting with the 7 significantly upweighted clusters highlighted in yellow. Clusters are named so that the first number is the parent cluster and the last number is the final sub cluster. Weights reassigned by HDXer are used to calculate  $\log(\Omega_j/\Omega_i)$  and are averaged over all the frames of a given cluster. The number of frames that comprise each cluster is listed.

**Supporting references:**

1. Bradshaw, R. T., F. Marinelli, J. D. Faraldo-Gomez, and L. R. Forrest. 2020. Interpretation of HDX Data by Maximum-Entropy Reweighting of Simulated Structural Ensembles. *Biophys J* 118(7):1649-1664, 10.1016/j.bpj.2020.02.005.
